# Supplementary material
Source: PubMed Central journal article supplement (PMC3700428)
Supplement: NIHMS435070-supplement-ESI.pdf [file NIHMS435070-supplement-ESI.pdf]

**Supporting Material:**

**Figures**

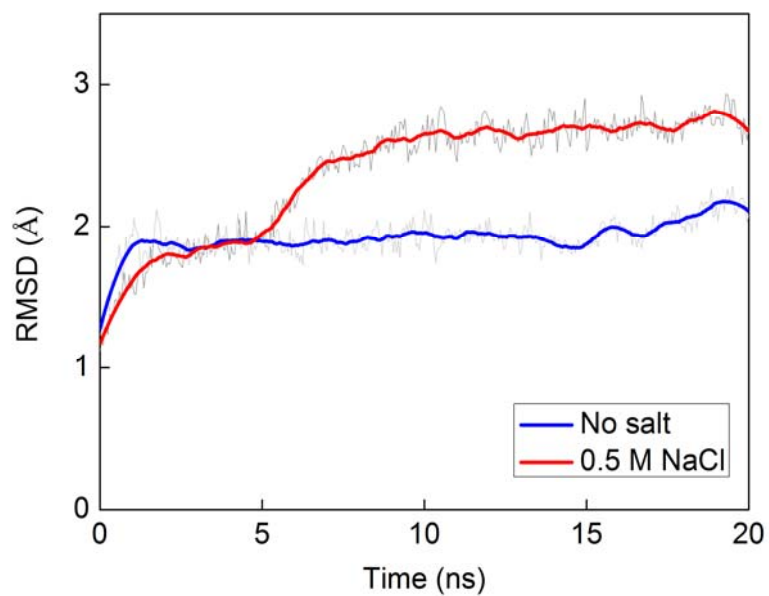

**Figure S1.** The RMSD of the full atomic model comparing against the initial conformation in equilibration process as a function of simulation time.

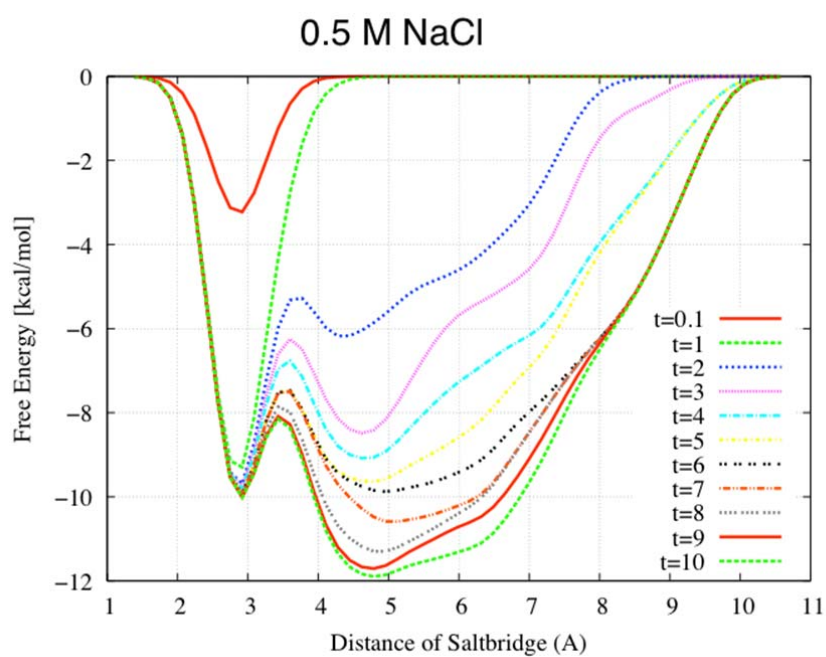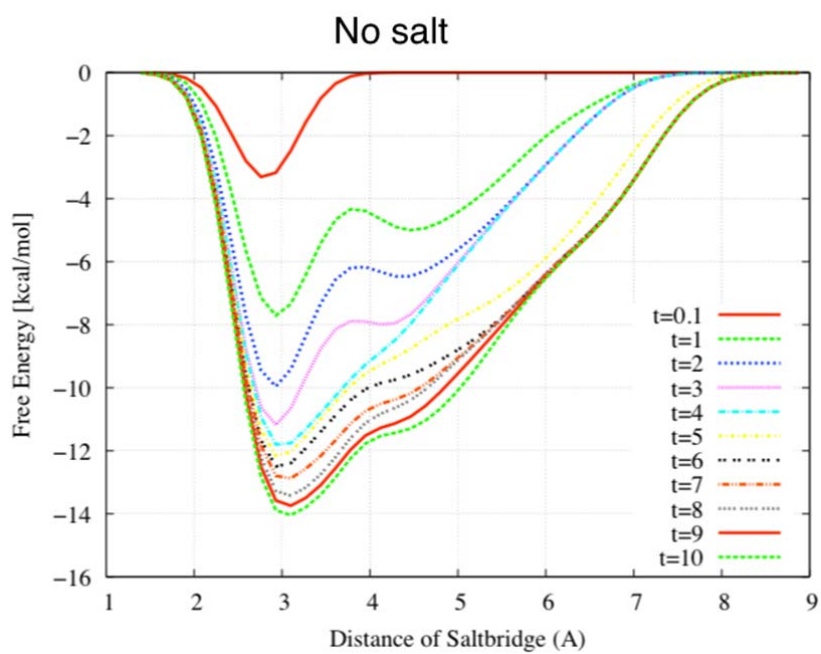

**Figure S2.** The evolution of the free-energy landscape with increasing time for non-salt and 0.5 M NaCl solvent conditions.

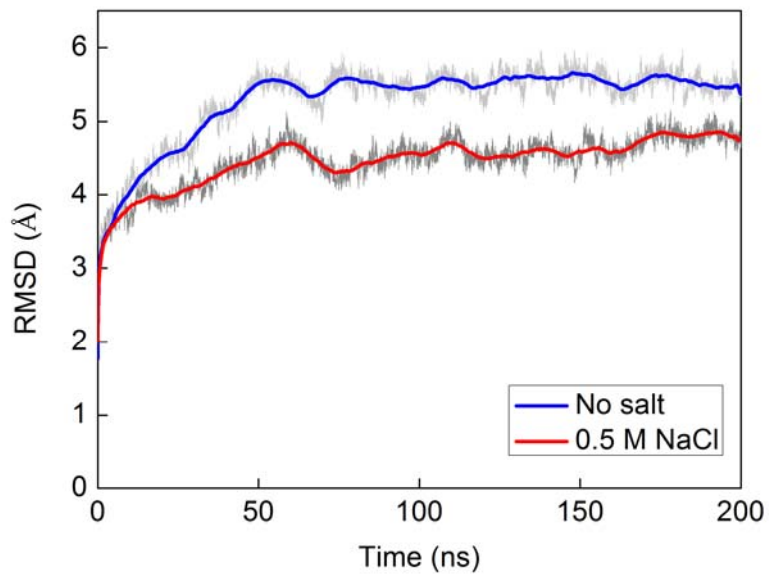

**Figure S3.** The RMSD of the coarse-grained model comparing against the initial conformation in equilibration process as a function of simulation time.

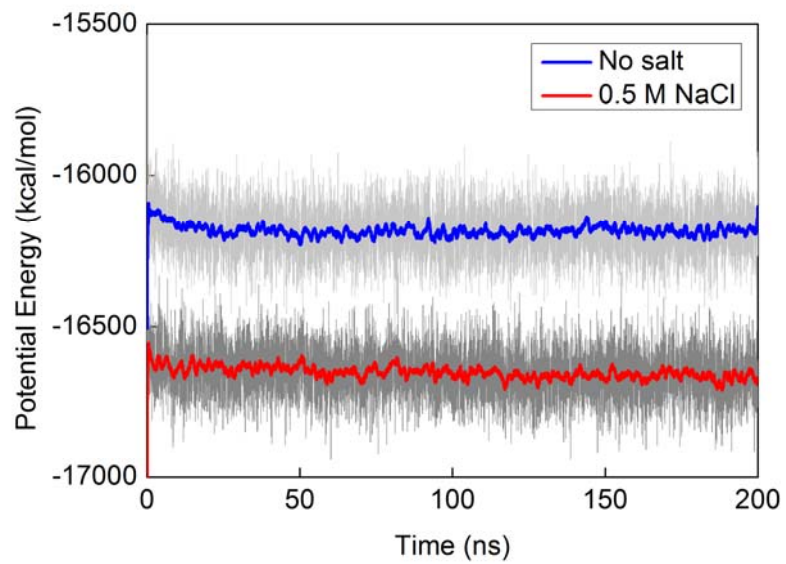

**Figure S4.** The potential energy of the coarse-grained model in equilibration process as a function of simulation time for different solvent conditions.
